# Supplementary material
Source: publisher figshare collection journal article supplement (https://tandf.figshare.com/ndownloader/files/14423900)
Supplement: Supplementary file 1 [file 14423900]

## SUPPLEMENTAL DATA

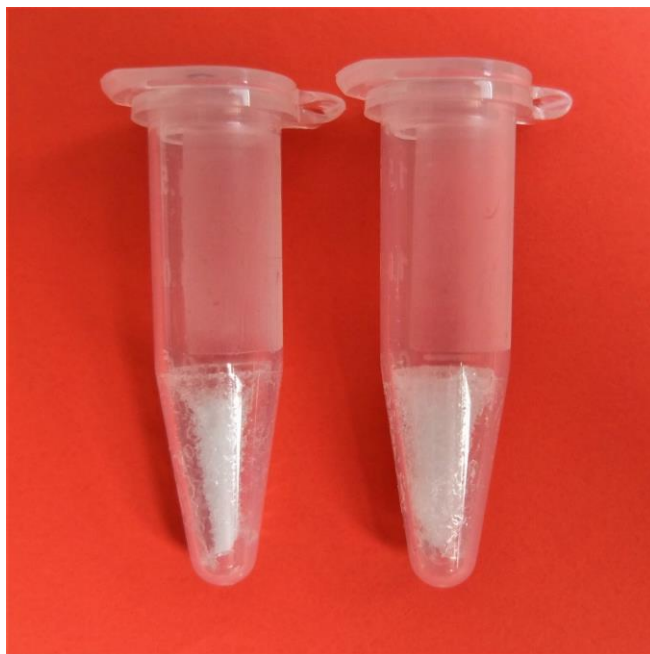

**Supplementary figure 1.** SQAd NPs samples after freeze-drying, using 5 % wt. sucrose (left) or 5 % wt. trehalose (right).

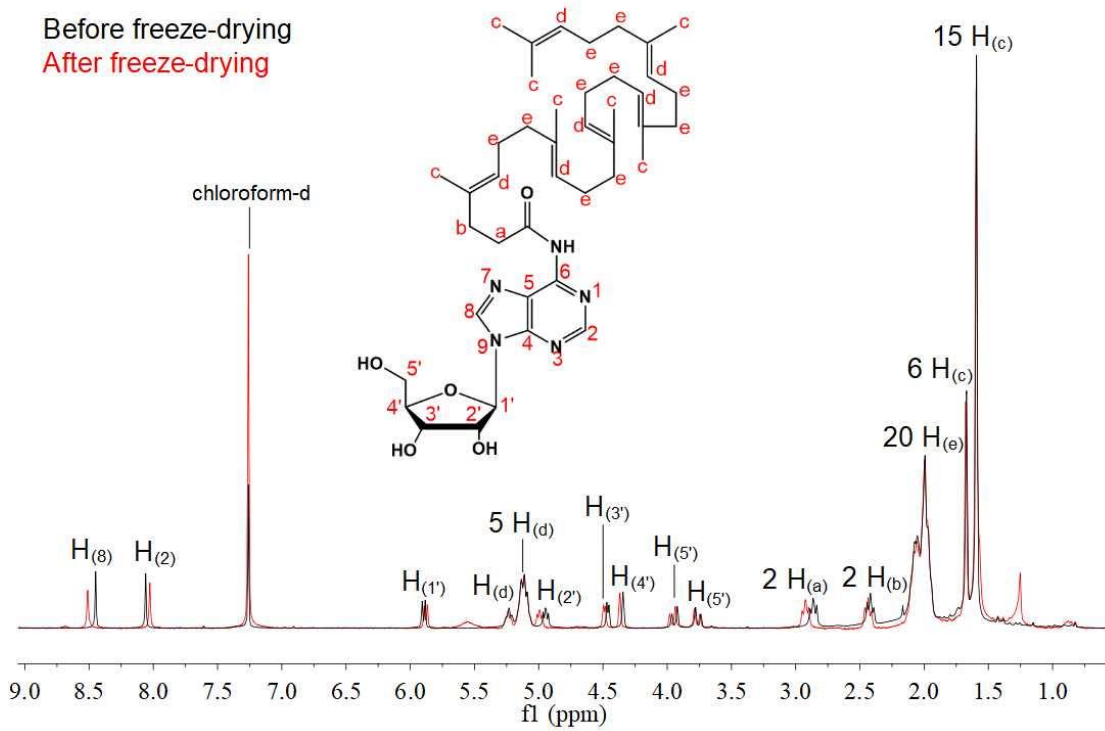

**Supplementary figure 2.**  $^1\text{H}$  NMR spectra of SQAd bioconjugate dissolved in chloroform-d (black spectrum) or formulated as NPs, freeze-dried in 5 % wt. trehalose and dissolved in chloroform-d (red spectrum). A drop of  $\text{D}_2\text{O}$  was added in each sample.
